# Supplementary material for: The genomic profiling of high-risk smoldering myeloma patients treated with an intensive strategy unveils potential markers of resistance and progression
Source: PubMed Central journal article supplement (PMC11059156; doi:10.1038/s41408-024-01053-3), 2024-04-29
Supplement: 41408_2024_1053_MOESM1_ESM.pdf [file 41408_2024_1053_MOESM1_ESM.pdf]

SUPPLEMENTARY MATERIALS

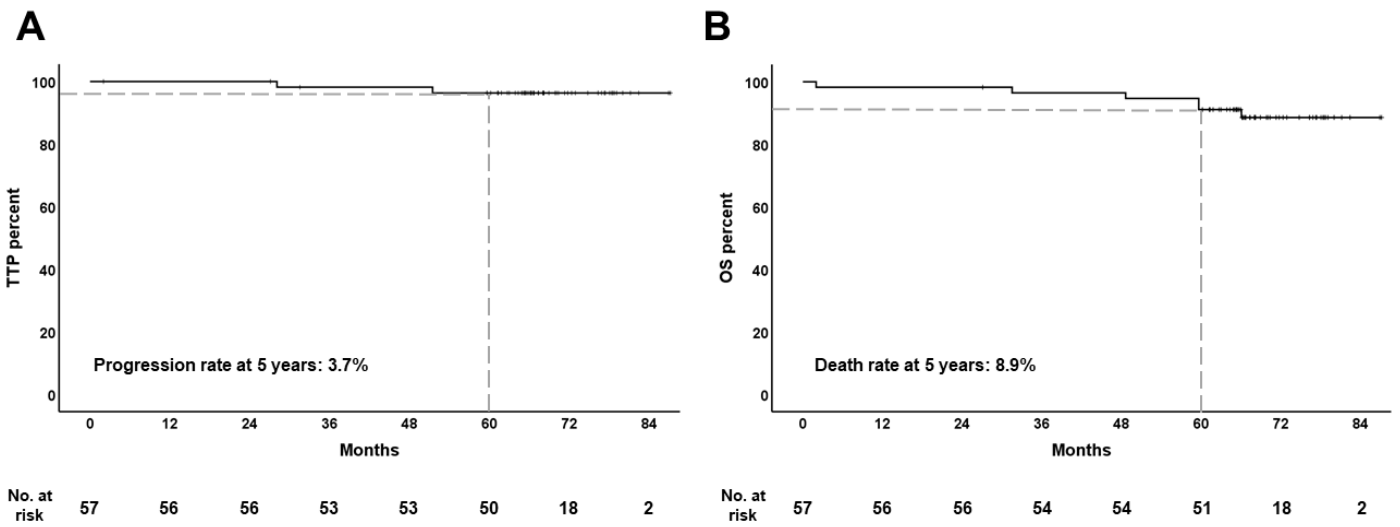

**Supplementary Figure 1. Time to progression and overall survival of all patients.** At five years of follow up, 96.3% remained free of clinical progression to symptomatic myeloma (A), and 91.1% were still alive (B). Causes of death included progression of the disease (2), cardiopulmonary toxicity (1), cardiac arrest (1), massive ischemic stroke (1), and myelodysplastic syndrome/neoplasia (1). OS: overall survival; TTP: time to progression.

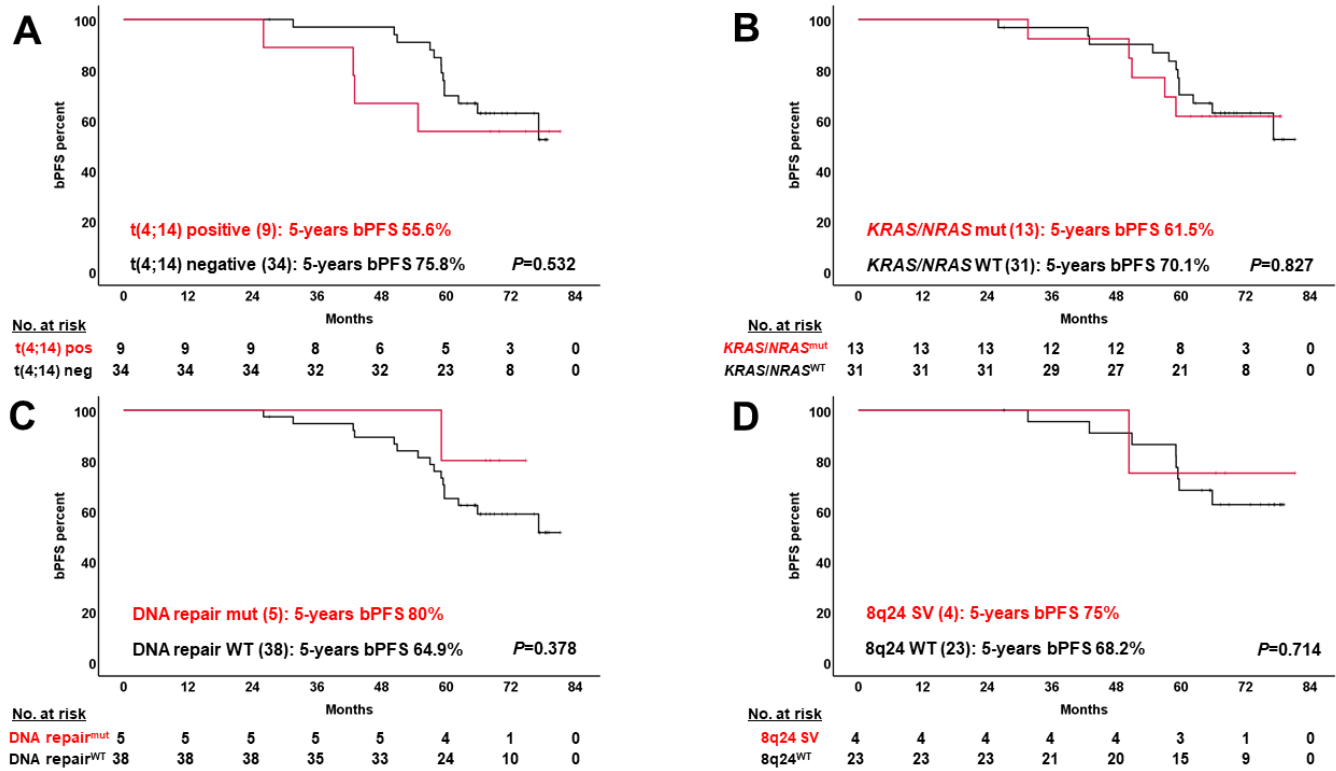

**Supplementary Figure 2. Kaplan-Meier plots of previously described genomic risk factors in high-risk smoldering myeloma.** Biochemical progression-free survival curves of the 44 high-risk SMM cases were plotted based on the presence (red) or absence (black) of different alterations. (A) t(4;14) translocation; (B) mutations in *KRAS* or *NRAS*; (C) Alterations in the DNA repair pathway, including *ATM* or *TP53* mutations and 17p deletions; (D) Gains or translocations involving the *MYC* locus. The number of patients for each category is shown in brackets. bPFS: biochemical progression-free survival; mut: mutated; SV: structural variant; WT: wild type.

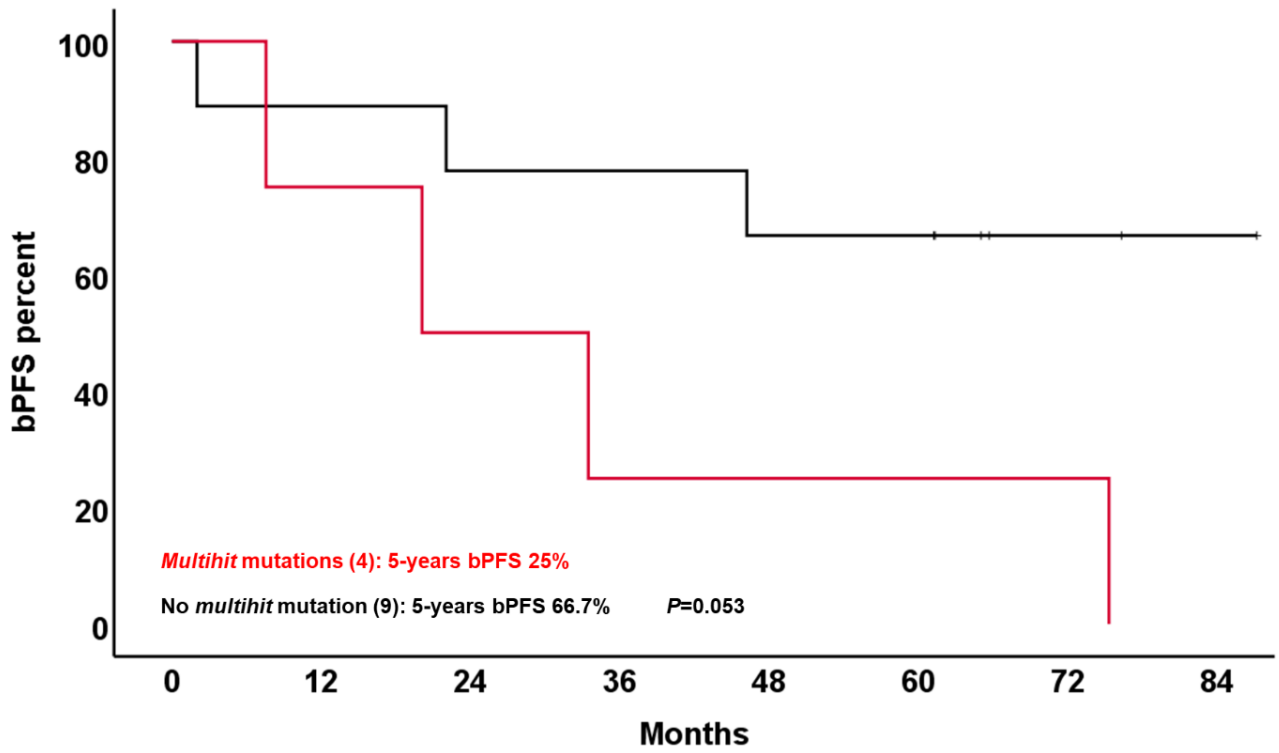

**Supplementary Figure 3. *Multihit* mutations may have a prognostic role in ultra-high risk smoldering myeloma.** Biochemical progression-free survival curve of the 13 ultra-high risk smoldering myeloma cases were plotted based on the presence (red) or absence (black) of *multihit* mutations. bPFS: biochemical progression-free survival.

**Supplemental table 1. Clinical characteristics of the patients**

|                                                                | <b>Present series (N=57)</b> | <b>GEM CESAR series (N=90)</b> |
|----------------------------------------------------------------|------------------------------|--------------------------------|
| <b>Age</b> , median (range)                                    | 59 (33-70)                   | 59 (33-70)                     |
| <b>Cytogenetics</b>                                            |                              |                                |
| Standard risk (SR)                                             | 73.7%                        | 62%                            |
| High risk (HR)                                                 | 22.8%                        | 23%                            |
| Unknown                                                        | 3.5%                         | 14%                            |
| <b>Serum albumin</b> , mean $\pm$ SD                           | 3.9 $\pm$ 0.5 g/dL           | 4.1 g/dL                       |
| <b>Serum <math>\beta</math>2-microglobulin</b> , mean $\pm$ SD | 2.8 $\pm$ 1.0 mg/L           | 2.8 mg/L                       |
| <b>Serum hemoglobin</b> , mean $\pm$ SD                        | 12.9 $\pm$ 1.7 g/dL          | 12.7 g/dL                      |
| <b>International Staging System, ISS</b>                       |                              |                                |
| ISS I                                                          | 75.4%                        | 69.6%                          |
| ISS II                                                         | 21.1%                        | 26.2%                          |
| ISS III                                                        | 1.8%                         | 4.1%                           |

SD: Standard deviation

**Supplemental Table 2. Supplemental Table 2. Frequencies of mutations, common CNA, translocations and molecular pathways in high risk vs ultra-high risk smoldering myeloma.**

| Alteration            | High-risk SMM (N=44) |      | Ultra-high risk SMM (N=13) |      |                      | CoMMpass cohort (N=946) |      |                      |
|-----------------------|----------------------|------|----------------------------|------|----------------------|-------------------------|------|----------------------|
|                       | N                    | %    | N                          | %    | p-value <sup>a</sup> | N                       | %    | p-value <sup>b</sup> |
| SNVs and indels       |                      |      |                            |      |                      |                         |      |                      |
| <i>KRAS</i>           | 7/44                 | 15.9 | 3/13                       | 23.1 | 0.85                 | 235/946                 | 24.8 | 0.24; 0.88           |
| <i>DIS3</i>           | 6/44                 | 13.6 | 3/13                       | 23.1 | 0.70                 | 97/946                  | 10.3 | 0.64; 0.29           |
| <i>FGFR3</i>          | 7/44                 | 15.9 | 1/13                       | 7.7  | 0.84                 | 30/946                  | 3.2  | <0.001; 0.90         |
| <i>NRAS</i>           | 6/44                 | 13.6 | 1/13                       | 7.7  | 0.93                 | 201/946                 | 21.3 | 0.30; 0.40           |
| <i>FAT3</i>           | 4/44                 | 9.1  | 2/13                       | 15.4 | 0.89                 | 47/946                  | 5.0  | 0.39; 0.29           |
| <i>FAM46C</i>         | 3/44                 | 6.8  | 1/13                       | 7.7  | 0.91                 | 88/946                  | 9.3  | 0.77; 0.84           |
| <i>PRKD2</i>          | 4/44                 | 9.1  | 0/13                       | 0    | 0.61                 | 28/946                  | 3.0  | 0.07; 0.53           |
| <i>DUSP2</i>          | 2/44                 | 4.5  | 1/13                       | 7.7  | 0.66                 | 42/946                  | 4.4  | 0.97; 0.57           |
| <i>TRAF3</i>          | 0/44                 | 0    | 3/13                       | 23.1 | 0.01                 | 69/946                  | 7.3  | 0.12; 0.10           |
| <i>NF1</i>            | 3/44                 | 6.8  | 0/13                       | 0    | 0.79                 | 15/946                  | 1.6  | 0.05; 0.65           |
| <i>LTB</i>            | 3/44                 | 6.8  | 0/13                       | 0    | 0.79                 | 34/946                  | 3.6  | 0.49; 0.49           |
| <i>TRAF2</i>          | 1/44                 | 2.3  | 1/13                       | 7.7  | 0.94                 | 13/946                  | 1.4  | 0.62; 0.47           |
| <i>TP53</i>           | 1/44                 | 2.3  | 1/13                       | 7.7  | 0.94                 | 40/946                  | 4.2  | 0.80; 0.54           |
| <i>ZNF292</i>         | 1/44                 | 2.3  | 1/13                       | 7.7  | 0.94                 | 20/946                  | 2.1  | 0.94; 0.68           |
| <i>IRF4</i>           | 1/44                 | 2.3  | 1/13                       | 7.7  | 0.94                 | 19/946                  | 2.0  | 0.90; 0.65           |
| <i>ACTG1</i>          | 1/44                 | 2.3  | 1/13                       | 7.7  | 0.94                 | 24/946                  | 2.5  | 0.91; 0.78           |
| <i>HIST1H1E</i>       | 1/44                 | 2.3  | 0/13                       | 0    | 0.58                 | 41/946                  | 4.3  | 0.78; 0.94           |
| <i>BRAF</i>           | 1/44                 | 2.3  | 0/13                       | 0    | 0.58                 | 64/946                  | 7.0  | 0.34; 0.68           |
| <i>ATM</i>            | 1/44                 | 2.3  | 0/13                       | 0    | 0.58                 | 31/946                  | 3.3  | 0.71; 0.51           |
| <i>CCND1</i>          | 1/44                 | 2.3  | 0/13                       | 0    | 0.58                 | 17/946                  | 1.8  | 0.82; 0.62           |
| <i>KLHL6</i>          | 1/44                 | 2.3  | 0/13                       | 0    | 0.58                 | 23/946                  | 2.4  | 0.95; 0.57           |
| <i>PRDM1</i>          | 1/44                 | 2.3  | 0/13                       | 0    | 0.58                 | 19/946                  | 2.0  | 0.90; 0.61           |
| <i>HUWE1</i>          | 1/44                 | 2.3  | 0/13                       | 0    | 0.58                 | 31/946                  | 3.3  | 0.71; 0.51           |
| <i>SP140</i>          | 0/44                 | 0    | 1/13                       | 7.7  | 0.51                 | 30/946                  | 3.2  | 0.45; 0.90           |
| <i>BIRC2</i>          | 1/44                 | 2.3  | 0/13                       | 0    | 0.58                 | 3/946                   | 0.3  | 0.43; 0.84           |
| <i>MAF</i>            | 0/44                 | 0    | 1/13                       | 7.7  | 0.51                 | 8/946                   | 0.9  | 0.54; 0.27           |
| <i>CYLD</i>           | 1/44                 | 2.3  | 0/13                       | 0    | 0.58                 | 25/946                  | 2.6  | 0.88; 0.55           |
| <i>NFKB2</i>          | 1/44                 | 2.3  | 0/13                       | 0    | 0.58                 | 18/946                  | 1.9  | 0.86; 0.62           |
| <i>ROBO1</i>          | 1/44                 | 2.3  | 0/13                       | 0    | 0.58                 | 24/946                  | 2.5  | 0.91; 0.56           |
| <i>ZFHX4</i>          | 0/44                 | 0    | 1/13                       | 7.7  | 0.51                 | 39/946                  | 4.1  | 0.33; 0.52           |
| Structural variants   |                      |      |                            |      |                      |                         |      |                      |
| t(4;14)               | 9/43                 | 20.9 | 2/13                       | 15.4 | 0.97                 | 105/874                 | 12.0 | 0.13; 0.71           |
| t(14;16)              | 0/42                 | 0,0  | 1/13                       | 7.7  | 0.53                 | 23/874                  | 2.6  | 0.56; 0.80           |
| Ig-8q24 translocation | 1/28                 | 3.6  | 1/12                       | 8.3  | 0.53                 | 73/874                  | 8.3  | 0.58; 1.00           |
| t(11;14)              | 2/24                 | 8.3  | 2/9                        | 22.2 | 0.62                 | 174/874                 | 19.9 | 0.25; 0.86           |
| del17p                | 3/43                 | 7.0  | 0/13                       | 0    | 0.78                 | 114/886                 | 12.9 | 0.37; 0.33           |
| 1q gain/amp           | 22/41                | 53.7 | 6/13                       | 46.2 | 0.88                 | 311/886                 | 35.1 | 0.02; 0.59           |
| 1p del                | 2/40                 | 5.0  | 0/13                       | 0    | 0.41                 | 222/886                 | 25.1 | 0.007; 0.08          |
| 8q24 gain             | 3/28                 | 10.7 | 2/12                       | 16.7 | 0.60                 | 85/886                  | 9.6  | 0.84; 0.74           |
| Molecular pathways    |                      |      |                            |      |                      |                         |      |                      |
| MAPK                  | 25/44                | 56.8 | 5/13                       | 38.5 | 0.39                 | 481/946                 | 50.8 | 0.53; 0.54           |
| NF-κβ                 | 4/44                 | 9.1  | 4/13                       | 30.8 | 0.13                 | 137/946                 | 14.5 | 0.43; 0.21           |
| RNA PROCESSING        | 9/44                 | 20.5 | 4/13                       | 30.8 | 0.69                 | 162/946                 | 17.1 | 0.71; 0.36           |
| DNA REPAIR            | 5/44                 | 11.4 | 1/13                       | 7.7  | 0.70                 | 63/946                  | 6.7  | 0.37; 0.88           |
| CELL CYCLE            | 1/44                 | 2.3  | 0/13                       | 0    | 0.58                 | 21/946                  | 2.2  | 0.98; 0.59           |
| B CELL DEVELOPMENT    | 2/44                 | 4.5  | 1/13                       | 7.7  | 0.65                 | 35/946                  | 3.7  | 0.77; 0.98           |

Data from patients enrolled in the CoMMpass study were used as reference. <sup>a</sup>P-values for high-risk vs ultra-high risk comparisons. <sup>b</sup>P-values for CoMMpass vs high-risk/ultra-high risk comparisons. Statistically significant p-values appear in a coarse hatching pattern. amp: amplification; del: deletion; Ig: immunoglobulin; MAPK: mitogen-activated protein kinase; MM: multiple myeloma; NA: not assessed; NF-κβ: nuclear factor kappa beta; SMM: smoldering myeloma.

**Supplemental table 3. List of patients with *FGFR3* mutations.**

| Patient ID | Diagnosis | <i>FGFR3</i> mutation                   | Pathogenicity                                       | Altered protein domain | t(4;14) by FISH | Clinical outcome                                                                                   |
|------------|-----------|-----------------------------------------|-----------------------------------------------------|------------------------|-----------------|----------------------------------------------------------------------------------------------------|
| 292-04     | HR SMM    | c.742C>T; p.(Arg248Cys).<br>VAF: 29.3%  | Pathogenic (COSM714,<br>rs121913482)                | Immunoglobulin #2      | Positive (75%)  | -MRD conversion from - to + (Apr 2017).<br>-Clinical progression (Jul 2020).<br>-Death (Oct 2021). |
| 289-01     | HR SMM    | c.363C>A; p.(Phe121Leu).<br>VAF: 8%     | Not reported                                        | Immunoglobulin #1      | Positive (80%)  | Alive and progression-free (Jul 2022)                                                              |
| 287-02     | HR SMM    | c.1040T>G; p.(Phe347Cys).<br>VAF: 16.5% | Unknown significance                                | Immunoglobulin #3      | Positive (100%) | Alive and progression-free (Jul 2022)                                                              |
| 303-02     | HR SMM    | c.2272G>A; p.(Asp758Asn).<br>VAF: 48%   | Unknown significance                                | Protein kinase         | Negative        | Alive and progression-free (Aug 2022)                                                              |
| 382-02     | UHR SMM   | c.1138G>A; p.(Gly380Arg).<br>VAF: 30.1% | Probably pathogenic<br>(COSM1133722,<br>rs28931614) | None                   | Positive (99%)  | -Sustained MRD +.<br>-Clinical progression (Dec 2018).<br>-Death (Aug 2020).                       |
| 382-05     | HR SMM    | c.722A>G; p.(Tyr241Cys).<br>VAF: 13%    | Probably pathogenic<br>(COSM13247)                  | Immunoglobulin #2      | Positive (100%) | -Sustained MRD +.<br>-Biochemical progression (Sep 2021).                                          |
| 383-09     | HR SMM    | c.677A>G; p.(Tyr226Cys).<br>VAF: 37%    | Unknown significance                                | Immunoglobulin #2      | Positive (85%)  | -MRD conversion from - to + (May 2019).<br>-Relapse from CR (Nov 2020).                            |
| 296-02     | HR SMM    | c.833A>G; p.(Tyr278Cys).<br>VAF: 22%    | Probably pathogenic<br>(rs121913115)                | Immunoglobulin #3      | Positive (77%)  | -Biochemical progression (Aug 2019).                                                               |

For each patient, we describe the main features of *FGFR3* mutations, including nucleotide and amino acid changes, VAF, the level of pathogenicity, protein domains potentially altered by the mutation, concurrent t(4;14) translocation by FISH and post treatment outcomes. The four HR SMM patients that experienced clinical or biochemical progression had missense mutations introducing amino acid substitutions to Cysteine.

CR: complete response; FISH: fluorescent *in situ* hybridization; HR: high risk; MRD: minimal residual disease; VAF: variant allele frequency; SMM: smoldering myeloma; UHR: ultra-high risk.
